# Supplementary material for: The Biometric Parameters of Microgreen Crops Grown under Various Light Conditions
Source: MDPI journal article supplement (doi:10.3390/agriculture12050576), 2022-04-20
Supplement: s1 [file s1]

Table S2. Morphological parameters of individual species.

| Species           | Length [cm]       |                    |                     | Fresh mass [mg]                       |                   |                   | Dry weight [mg]   |                    |                    | H/DW ratio [cm mg <sup>-1</sup> ] |                    |                    |
|-------------------|-------------------|--------------------|---------------------|---------------------------------------|-------------------|-------------------|-------------------|--------------------|--------------------|-----------------------------------|--------------------|--------------------|
|                   |                   |                    |                     | Type of spectral composition of light |                   |                   |                   |                    |                    |                                   |                    |                    |
|                   | R                 | B                  | R+B                 | R                                     | B                 | R+B               | R                 | B                  | R+B                | R                                 | B                  | R+B                |
| black radish      | 12.3 <sup>a</sup> | 11.8 <sup>a</sup>  | 11.4 <sup>a</sup>   | 357 <sup>a</sup>                      | 313 <sup>b</sup>  | 378 <sup>a</sup>  | 17.8 <sup>a</sup> | 14.80 <sup>b</sup> | 18.8 <sup>a</sup>  | 0.70 <sup>b</sup>                 | 0.80 <sup>a</sup>  | 0.62 <sup>c</sup>  |
| borage            | 8.7 <sup>a</sup>  | 8.1 <sup>a</sup>   | 5.5 <sup>b</sup>    | 556 <sup>a</sup>                      | 542 <sup>a</sup>  | 362 <sup>b</sup>  | 27.7 <sup>b</sup> | 43.32 <sup>a</sup> | 20.4 <sup>b</sup>  | 0.31 <sup>a</sup>                 | 0.19 <sup>b</sup>  | 0.27 <sup>a</sup>  |
| broccoli          | 9.5 <sup>a</sup>  | 8.6 <sup>b</sup>   | 8.1 <sup>b</sup>    | 82 <sup>a</sup>                       | 77 <sup>b</sup>   | 57 <sup>c</sup>   | 4.6 <sup>a</sup>  | 3.77 <sup>b</sup>  | 4.7 <sup>a</sup>   | 2.07 <sup>ab</sup>                | 2.29 <sup>a</sup>  | 1.76 <sup>b</sup>  |
| coriander         | 9.1 <sup>a</sup>  | 7.1 <sup>b</sup>   | 8.7 <sup>a</sup>    | 40 <sup>a</sup>                       | 22 <sup>b</sup>   | 23 <sup>b</sup>   | 2.7 <sup>a</sup>  | 2.22 <sup>a</sup>  | 2.88 <sup>a</sup>  | 4.05 <sup>a</sup>                 | 3.28 <sup>b</sup>  | 3.01 <sup>b</sup>  |
| dill              | 10.8 <sup>a</sup> | 10.8 <sup>a</sup>  | 9.8 <sup>a</sup>    | 23 <sup>b</sup>                       | 43 <sup>a</sup>   | 30 <sup>b</sup>   | 0.8 <sup>b</sup>  | 1.04 <sup>b</sup>  | 2.1 <sup>a</sup>   | 13.70 <sup>a</sup>                | 11.11 <sup>b</sup> | 4.95 <sup>c</sup>  |
| garden cress      | 6.8 <sup>b</sup>  | 9.6 <sup>a</sup>   | 9.3 <sup>a</sup>    | 74 <sup>c</sup>                       | 145 <sup>a</sup>  | 100 <sup>b</sup>  | 3.3 <sup>b</sup>  | 7.58 <sup>a</sup>  | 6.2 <sup>a</sup>   | 2.06 <sup>a</sup>                 | 1.27 <sup>b</sup>  | 1.55 <sup>b</sup>  |
| garnet amaranth   | 5.0 <sup>b</sup>  | 5.5 <sup>b</sup>   | 7.4 <sup>a</sup>    | 16 <sup>b</sup>                       | 49 <sup>a</sup>   | 9 <sup>b</sup>    | 1.8 <sup>a</sup>  | 1.97 <sup>a</sup>  | 0.7 <sup>b</sup>   | 2.76 <sup>b</sup>                 | 3.01 <sup>b</sup>  | 11.17 <sup>a</sup> |
| green kale        | 9.0 <sup>a</sup>  | 7.4 <sup>b</sup>   | 7.6 <sup>b</sup>    | 105 <sup>a</sup>                      | 92 <sup>b</sup>   | 79 <sup>c</sup>   | 5.1 <sup>a</sup>  | 4.34 <sup>b</sup>  | 4.9 <sup>ab</sup>  | 1.78 <sup>a</sup>                 | 1.74 <sup>a</sup>  | 1.55 <sup>a</sup>  |
| green sweet basil | 4.2 <sup>a</sup>  | 4.5 <sup>a</sup>   | 4.5 <sup>a</sup>    | 59 <sup>b</sup>                       | 84 <sup>a</sup>   | 40 <sup>c</sup>   | 2.5 <sup>b</sup>  | 4.90 <sup>a</sup>  | 2.9 <sup>b</sup>   | 1.75 <sup>a</sup>                 | 0.94 <sup>b</sup>  | 1.57 <sup>a</sup>  |
| Indian mustard    | 9.2 <sup>b</sup>  | 11.2 <sup>a</sup>  | 11.4 <sup>a</sup>   | 121 <sup>ab</sup>                     | 96 <sup>b</sup>   | 131 <sup>a</sup>  | 13.5 <sup>a</sup> | 4.9 <sup>ab</sup>  | 9.7 <sup>ab</sup>  | 0.72 <sup>b</sup>                 | 2.31 <sup>a</sup>  | 1.20 <sup>b</sup>  |
| kale              | 6.5 <sup>a</sup>  | 5.6 <sup>a</sup>   | 6.1 <sup>a</sup>    | 118 <sup>a</sup>                      | 83 <sup>b</sup>   | 91 <sup>b</sup>   | 6.9 <sup>a</sup>  | 4.5 <sup>b</sup>   | 5.7 <sup>ab</sup>  | 0.94 <sup>b</sup>                 | 1.30 <sup>a</sup>  | 1.09 <sup>ab</sup> |
| leaf chicory      | 6.3 <sup>a</sup>  | 4.2 <sup>c</sup>   | 5.0 <sup>b</sup>    | 95 <sup>a</sup>                       | 59 <sup>b</sup>   | 66 <sup>b</sup>   | 3.4 <sup>a</sup>  | 3.4 <sup>a</sup>   | 4.0 <sup>a</sup>   | 1.87 <sup>a</sup>                 | 1.36 <sup>b</sup>  | 1.30 <sup>b</sup>  |
| leaf lettuce      | 7.3 <sup>a</sup>  | 5.8 <sup>b</sup>   | 6.1 <sup>b</sup>    | 82 <sup>a</sup>                       | 66 <sup>b</sup>   | 67 <sup>b</sup>   | 3.8 <sup>a</sup>  | 2.6 <sup>b</sup>   | 2.5 <sup>b</sup>   | 2.00 <sup>c</sup>                 | 2.31 <sup>b</sup>  | 2.61 <sup>a</sup>  |
| lemon basil       | 3.8 <sup>b</sup>  | 5.4 <sup>a</sup>   | 4.1 <sup>b</sup>    | 22 <sup>b</sup>                       | 34 <sup>a</sup>   | 26 <sup>ab</sup>  | 2.3 <sup>c</sup>  | 5.9 <sup>a</sup>   | 3.7 <sup>b</sup>   | 1.84 <sup>a</sup>                 | 0.91 <sup>b</sup>  | 1.12 <sup>b</sup>  |
| lucerne           | 8.0 <sup>a</sup>  | 6.79 <sup>b</sup>  | 7.06 <sup>b</sup>   | 47 <sup>a</sup>                       | 41 <sup>b</sup>   | 30 <sup>c</sup>   | 2.8 <sup>a</sup>  | 2.5 <sup>b</sup>   | 2.0 <sup>c</sup>   | 2.92 <sup>b</sup>                 | 2.99 <sup>b</sup>  | 3.61 <sup>a</sup>  |
| mizuna            | 7.5 <sup>a</sup>  | 6.50 <sup>b</sup>  | 7.33 <sup>a</sup>   | 103 <sup>a</sup>                      | 76 <sup>b</sup>   | 97 <sup>ab</sup>  | 5.0 <sup>ab</sup> | 3.7 <sup>b</sup>   | 6.3 <sup>a</sup>   | 1.51 <sup>ab</sup>                | 1.79 <sup>a</sup>  | 1.19 <sup>b</sup>  |
| nasturtium        | 22.8 <sup>a</sup> | 26.22 <sup>a</sup> | 22.45 <sup>a</sup>  | 981 <sup>a</sup>                      | 995 <sup>a</sup>  | 1052 <sup>a</sup> | 91.0 <sup>a</sup> | 71.3 <sup>b</sup>  | 77.3 <sup>ab</sup> | 0.26 <sup>b</sup>                 | 0.38 <sup>a</sup>  | 0.29 <sup>ab</sup> |
| pea               | 8.2 <sup>a</sup>  | 8.20 <sup>a</sup>  | 8.65 <sup>a</sup>   | 366 <sup>b</sup>                      | 356 <sup>b</sup>  | 415 <sup>a</sup>  | 29.8 <sup>b</sup> | 30.6 <sup>b</sup>  | 34.6 <sup>a</sup>  | 0.28 <sup>a</sup>                 | 0.27 <sup>a</sup>  | 0.25 <sup>a</sup>  |
| perilla           | 2.0 <sup>b</sup>  | 3.72 <sup>a</sup>  | 2.90 <sup>ab</sup>  | 8 <sup>b</sup>                        | 30 <sup>a</sup>   | 12 <sup>b</sup>   | 0.8 <sup>b</sup>  | 2.9 <sup>a</sup>   | 1.7 <sup>ab</sup>  | 2.47 <sup>a</sup>                 | 1.40 <sup>b</sup>  | 1.78 <sup>b</sup>  |
| purple kohlrabi   | 7.9 <sup>a</sup>  | 7.87 <sup>a</sup>  | 6.96 <sup>a</sup>   | 707 <sup>a</sup>                      | 116 <sup>b</sup>  | 88 <sup>b</sup>   | 33.4 <sup>a</sup> | 5.4 <sup>b</sup>   | 5.4 <sup>b</sup>   | 0.24 <sup>b</sup>                 | 1.49 <sup>a</sup>  | 1.31 <sup>a</sup>  |
| radish            | 12.8 <sup>a</sup> | 10.46 <sup>b</sup> | 11.34 <sup>ab</sup> | 350 <sup>a</sup>                      | 257 <sup>b</sup>  | 236 <sup>b</sup>  | 17.6 <sup>a</sup> | 13.5 <sup>b</sup>  | 14.0 <sup>b</sup>  | 0.73 <sup>a</sup>                 | 0.79 <sup>a</sup>  | 0.82 <sup>a</sup>  |
| red cabbage       | 8.3 <sup>a</sup>  | 7.27 <sup>a</sup>  | 8.06 <sup>a</sup>   | 131 <sup>a</sup>                      | 121 <sup>a</sup>  | 89 <sup>b</sup>   | 6.3 <sup>a</sup>  | 5.9 <sup>a</sup>   | 5.0 <sup>b</sup>   | 1.35 <sup>b</sup>                 | 1.24 <sup>b</sup>  | 1.63 <sup>a</sup>  |
| red sweet basil   | 2.6 <sup>b</sup>  | 3.52 <sup>a</sup>  | 3.08 <sup>ab</sup>  | 220 <sup>a</sup>                      | 24 <sup>a</sup>   | 13 <sup>b</sup>   | 2.4 <sup>a</sup>  | 2.7 <sup>a</sup>   | 1.4 <sup>b</sup>   | 1.21 <sup>b</sup>                 | 1.29 <sup>b</sup>  | 1.95 <sup>a</sup>  |
| red Swiss chard   | 8.6 <sup>a</sup>  | 6.82 <sup>b</sup>  | 7.30 <sup>b</sup>   | 79 <sup>a</sup>                       | 75 <sup>b</sup>   | 73 <sup>b</sup>   | 4.2 <sup>b</sup>  | 4.7 <sup>b</sup>   | 5.6 <sup>a</sup>   | 2.10 <sup>a</sup>                 | 1.49 <sup>b</sup>  | 1.33 <sup>b</sup>  |
| rocket            | 4.5 <sup>c</sup>  | 7.41 <sup>a</sup>  | 5.07 <sup>b</sup>   | 38 <sup>a</sup>                       | 32 <sup>b</sup>   | 30 <sup>b</sup>   | 3.0 <sup>b</sup>  | 1.3 <sup>c</sup>   | 4.4 <sup>a</sup>   | 1.52 <sup>b</sup>                 | 5.87 <sup>a</sup>  | 1.16 <sup>b</sup>  |
| spinach           | 10.0 <sup>a</sup> | 8.42 <sup>b</sup>  | 8.52 <sup>b</sup>   | 131 <sup>a</sup>                      | 103 <sup>ab</sup> | 90 <sup>b</sup>   | 5.0 <sup>b</sup>  | 8.2 <sup>a</sup>   | 6.6 <sup>ab</sup>  | 2.02 <sup>a</sup>                 | 1.04 <sup>b</sup>  | 1.29 <sup>b</sup>  |
| watercress        | 7.4 <sup>ab</sup> | 6.95 <sup>b</sup>  | 8.27 <sup>a</sup>   | 13 <sup>ab</sup>                      | 17 <sup>a</sup>   | 10 <sup>b</sup>   | 0.8 <sup>b</sup>  | 1.6 <sup>a</sup>   | 1.4 <sup>a</sup>   | 9.55 <sup>a</sup>                 | 4.49 <sup>b</sup>  | 6.09 <sup>b</sup>  |
| Welsh onion       | 8.7 <sup>a</sup>  | 7.63 <sup>a</sup>  | 8.12 <sup>a</sup>   | 27 <sup>a</sup>                       | 18 <sup>b</sup>   | 21 <sup>ab</sup>  | 1.6 <sup>a</sup>  | 1.0 <sup>b</sup>   | 1.5 <sup>a</sup>   | 5.75 <sup>b</sup>                 | 7.57 <sup>a</sup>  | 5.59 <sup>b</sup>  |

Data followed by the same letter do not differ significantly at  $\alpha = 0.05$  for each parameter and species. The R:B ratio for each combination – R light 6.7; B light 0.6; R+B light 1.6.
