# Supplementary material for: The Biometric Parameters of Microgreen Crops Grown under Various Light Conditions
Source: MDPI journal article supplement (doi:10.3390/agriculture12050576), 2022-04-20
Supplement: s1 [file s1]

Table S1. Twenty-eight microgreens assayed in the study.

| Commercial name   | Scientific name |                                                                  | Cultivar    |
|-------------------|-----------------|------------------------------------------------------------------|-------------|
|                   | Family          | Species                                                          |             |
| black radish      | Brassicaceae    | <i>Raphanus sativus</i> var. <i>black</i> L.                     |             |
| borage            | Boraginaceae    | <i>Borago officinalis</i> L.                                     |             |
| broccoli          | Brassicaceae    | <i>Brassica oleracea</i> var. <i>italica</i> Plenck              |             |
| coriander         | Apiaceae        | <i>Coriandrum sativum</i> L.                                     |             |
| dill              | Apiaceae        | <i>Anethum graveolens</i> L.                                     |             |
| garden cress      | Brassicaceae    | <i>Lepidium sativum</i> L.                                       |             |
| garnet amaranth   | Amaranthaceae   | <i>Amaranthus hypochondriacus</i> L.                             |             |
| green kale        | Brassicaceae    | <i>Brassica oleracea</i> L. var. <i>acephala</i> DC              |             |
| green sweet basil | Lamiaceae       | <i>Ocimum basilicum</i> L.                                       | Sweet Large |
| Indian mustard    | Brassicaceae    | <i>Brassica juncea</i> L. (Czern. et Coss.)                      |             |
| leaf chicory      | Asteraceae      | <i>Cichorium intybus</i> L.                                      |             |
| leaf lettuce      | Asteraceae      | <i>Lactuca sativa</i> L.                                         |             |
| lemon basil       | Lamiaceae       | <i>Ocimum basilicum</i> L. <i>citrodora</i>                      | Mrs Burns   |
| lucerne           | Fabaceae        | <i>Medicago sativa</i> L.                                        |             |
| mizuna            | Brassicaceae    | <i>Brassica rapa</i> L. ssp. <i>nipposinica</i>                  |             |
| nasturtium        | Tropaeolaceae   | <i>Tropaeolum majus</i> L. <i>nanum</i>                          |             |
| pea               | Fabaceae        | <i>Pisum sativum</i> L.                                          | Boogie      |
| perilla           | Lamiaceae       | <i>Perilla frutescens</i> (L.) Britt.                            |             |
| purple kohlrabi   | Brassicaceae    | <i>Brassica oleracea</i> L. var. <i>gongylodes</i>               |             |
| red cabbage       | Brassicaceae    | <i>Brassica oleracea</i> L. var. <i>capitata</i> f. <i>rubra</i> |             |
| red kale          | Brassicaceae    | <i>Brassica oleracea</i> L. var. <i>acephala</i> DC              | Scarlet     |
| red radish        | Brassicaceae    | <i>Raphanus sativus</i> L. var. <i>sativus</i> L.                |             |
| red sweet basil   | Lamiaceae       | <i>Ocimum basilicum</i> L.                                       | Dark Opal   |
| red Swiss chard   | Chenopodiaceae  | <i>Beta vulgaris</i> L. ssp. <i>cycla</i>                        |             |
| rocket            | Brassicaceae    | <i>Eruca sativa</i> L.                                           |             |
| spinach           | Chenopodiaceae  | <i>Spinacia oleracea</i> L.                                      |             |
| watercress        | Brassicaceae    | <i>Nasturtium officinale</i> R.Br.                               |             |
| Welsh onion       | Alliaceae       | <i>Allium fistulosum</i> L.                                      |             |
