# Supplementary figures and images for: The Biometric Parameters of Microgreen Crops Grown under Various Light Conditions
Source: MDPI journal article supplement (doi:10.3390/agriculture12050576), 2022-04-20

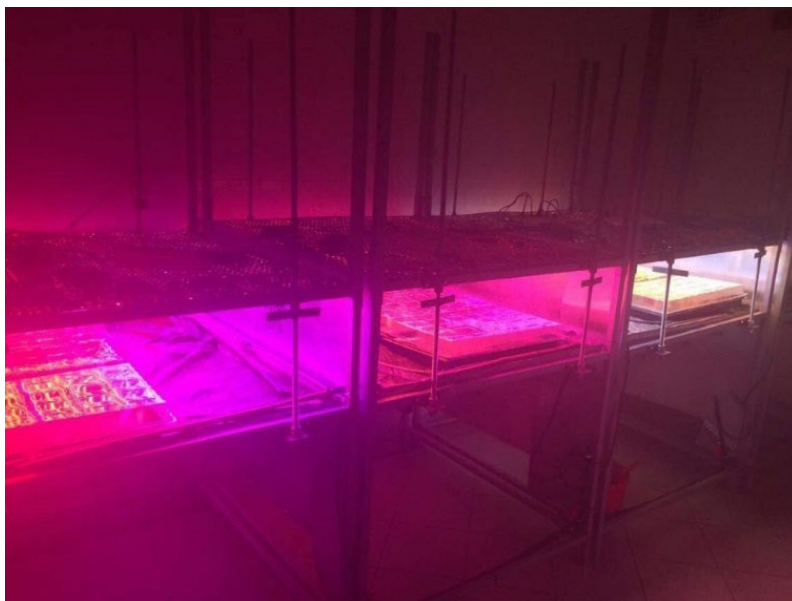

**Figure S1.** The growth chamber.

Supplement: s1 [file s1]
